# Supplementary material for: Against All Odds? Addiction History Associated with Better Viral Hepatitis Care: A Dutch Nationwide Claims Data Study
Source: MDPI journal article supplement (doi:10.3390/jcm11041146), 2022-02-21
Supplement: s1 [file jcm-1560788-supplementary.pdf › jcm-1560788-supplementary.pdf]

## SUPPLEMENTARY

**Table S1:** Required number of healthcare activities for healthcare utilization (HCU) outcomes.

| STAGE OF HCU                          | SEVERE SUBOPTIMAL | MILD SUBOPTIMAL | OPTIMAL    |
|---------------------------------------|-------------------|-----------------|------------|
| OUTPATIENT VISITS                     | ≤2                | >2              | >2         |
|                                       | <i>AND</i>        | <i>OR</i>       | <i>OR</i>  |
| BLOOD WITHDRAWAL                      | ≤2                | >2              | >2         |
|                                       | <i>AND</i>        | <i>OR</i>       | <i>OR</i>  |
| INTERVENTIONS                         | NO                | ≥1              | ≥1         |
| <i>IE. ABDOMINAL RADIOLOGY/BIOPSY</i> | <i>AND</i>        | <i>AND</i>      | <i>AND</i> |
| HBV/HCV MEDICATION                    | NO                | NO              | YES        |

**Table S2:** Year of diagnosis.

| Year of diagnosis | All patients (%) | AH+(%)    | AH-(%)     |
|-------------------|------------------|-----------|------------|
| - 2014            | 2142(20.4)       | 275(20.1) | 1867(20.4) |
| - 2015            | 1840(17.5)       | 302(22.0) | 1538(16.8) |
| - 2016            | 2430(23.1)       | 359(26.2) | 2071(22.7) |
| - 2017            | 2168(20.6)       | 241(17.6) | 1927(21.1) |
| - 2018            | 1933(18.4)       | 194(14.2) | 1739(19.0) |

**Table S3:** HCV/HBV Healthcare utilization(HCU)

| HCU                   | Suboptimal care |            | Optimal care |
|-----------------------|-----------------|------------|--------------|
|                       | Severe          | Mild       |              |
| Addicted patients     | 176(12.8)       | 401(29.2)  | 794 (57.9)   |
| N (%)                 |                 |            |              |
| Non-addicted patients | 1231(13,5)      | 3775(41,3) | 4136(45,2)   |
| N (%)                 |                 |            |              |
| Total patients N(%)   | 1407(13,4)      | 4176(39,7) | 4930(46,9)   |

**Table S4.** A: Sensitivity analysis. Association between opioid addiction and suboptimal healthcare utilization. B: Sensitivity analysis. Association between opioid addiction and severe suboptimal healthcare utilization within suboptimal HCU subgroup.

| A                |                                 |                    |         |                                     |              |         |
|------------------|---------------------------------|--------------------|---------|-------------------------------------|--------------|---------|
| Factor           | OR <sup>a</sup><br>(univariate) | 95%CI <sup>a</sup> | P value | aOR <sup>ab</sup><br>(multivariate) | 95%CI        | P value |
| Opioid Addiction | 0.61                            | (0.52, 0.72)       | <0.0001 | 0.75                                | (0.63, 0.89) | 0.001   |
| B                |                                 |                    |         |                                     |              |         |
| Factor           | OR <sup>a</sup><br>(univariate) | 95%CI <sup>a</sup> | P value | aOR <sup>ab</sup><br>(multivariate) | 95%CI        | P value |
| Opioid Addiction | 0.85                            | (0.63, 1.14)       | 0.27    | 0.70                                | (0.51, 0.95) | 0.020   |

<sup>a</sup>OR = Odds ratio; CI = confidence interval; aOR = adjusted odds ratio

<sup>b</sup>Adjusted for sex, age, migrant status, comorbidities (see table2)

**Table S5.** A: Identification of variables contributing to HCU. Association between variables and suboptimal healthcare utilization. B: Identification of variables contributing to HCU. Association between variables and severe suboptimal healthcare utilization within suboptimal HCU subgroup.

| A                 |                 |                    |         |                  |                    |         |
|-------------------|-----------------|--------------------|---------|------------------|--------------------|---------|
| Variable          | OR <sup>a</sup> | 95%CI <sup>a</sup> | P       | aOR <sup>a</sup> | 95%CI <sup>a</sup> | P       |
| Male sex          | 0.59            | (0.54, 0.63)       | <0.0001 | 0.70             | (0.65, 0.76)       | <0.0001 |
| Age(y)            | 0.98            | (0.97, 0.98)       | <0.0001 | 0.98             | (0.98, 0.98)       | <0.0001 |
| Migrant           | 1.62            | (1.50, 1.76)       | <0.0001 | 1.19             | (1.09, 1.30)       | 0.00014 |
| Addiction history | 0.60            | (0.54, 0.67)       | <0.0001 | 0.73             | (0.64, 0.82)       | <0.0001 |
| HIV               | 0.25            | (0.21, 0.30)       | <0.0001 | 0.30             | (0.25, 0.37)       | <0.0001 |
| Cirrhosis         | 0.29            | (0.22, 0.38)       | <0.0001 | 0.38             | (0.29, 0.51)       | <0.0001 |
| COPD              | 0.87            | (0.67, 1.14)       | 0.32    | 1.44             | (1.09, 1.91)       | 0.011   |
| Diabetes          | 0.54            | (0.41, 0.73)       | <0.0001 | 0.72             | (0.53, 0.97)       | 0.029   |
| Malignancy        | 0.57            | (0.48, 0.66)       | <0.0001 | 0.77             | (0.65, 0.91)       | 0.0022  |
| B                 |                 |                    |         |                  |                    |         |
| Covariate         | OR <sup>a</sup> | 95%CI <sup>a</sup> | P       | aOR <sup>a</sup> | 95%CI <sup>a</sup> | P       |
| Male sex          | 1.20            | (1.06, 1.36)       | 0.0038  | -                | -                  | -       |
| Age(y)            | 1.02            | (1.02, 1.03)       | <0.0001 | 1.02             | (1.01, 1.02)       | <0.0001 |
| Migrant           | 0.64            | (0.57, 0.73)       | 0.00066 | 0.79             | (0.69, 0.91)       | 0.00066 |
| Addiction history | 1.35            | (1.12, 1.63)       | 0.0020  | -                | -                  | -       |
| HIV               | 6.20            | (4.31, 8.92)       | <0.0001 | 5.66             | (3.91, 8.17)       | <0.0001 |
| Cirrhosis         | 1.25            | (0.75, 2.09)       | 0.394   | -                | -                  | -       |
| COPD              | 1.63            | (1.09, 2.43)       | 0.017   | -                | -                  | -       |
| Diabetes          | 1.06            | (0.82, 1.77)       | 0.822   | -                | -                  | -       |
| Malignancy        | 1.63            | (1.26, 2.11)       | 0.00022 | -                | -                  | -       |

<sup>a</sup>OR = Odds ratio; CI = confidence interval; aOR = adjusted odds ratio.
